# Supplementary material for: Effect of fine fibers on secondary fibers and recycled paper
Source: publisher site journal article supplement (doi:10.1515/npprj-2023-0062), 2023-11-17
Supplement: Supplementary file 1 [file j_npprj-2023-0062_suppl_001.docx]

Effect of fine fibers on secondary fibers and recycled paper

Ya Zhang, Yuxin Liu*, Jizhen Huang*, Kai Li, Liangliang An, Jianquan Hu, Wanruo Lei

Faculty of Chemical Engineering, Kunming University of Science and Technology, Kunming, Yunnan 650500, China

*Corresponding Author:

Yuxin Liu, E-mail: yuxinliukm@kmust.edu.cn; Jizhen Huang, E-mail: huangjizhen211@163.com.


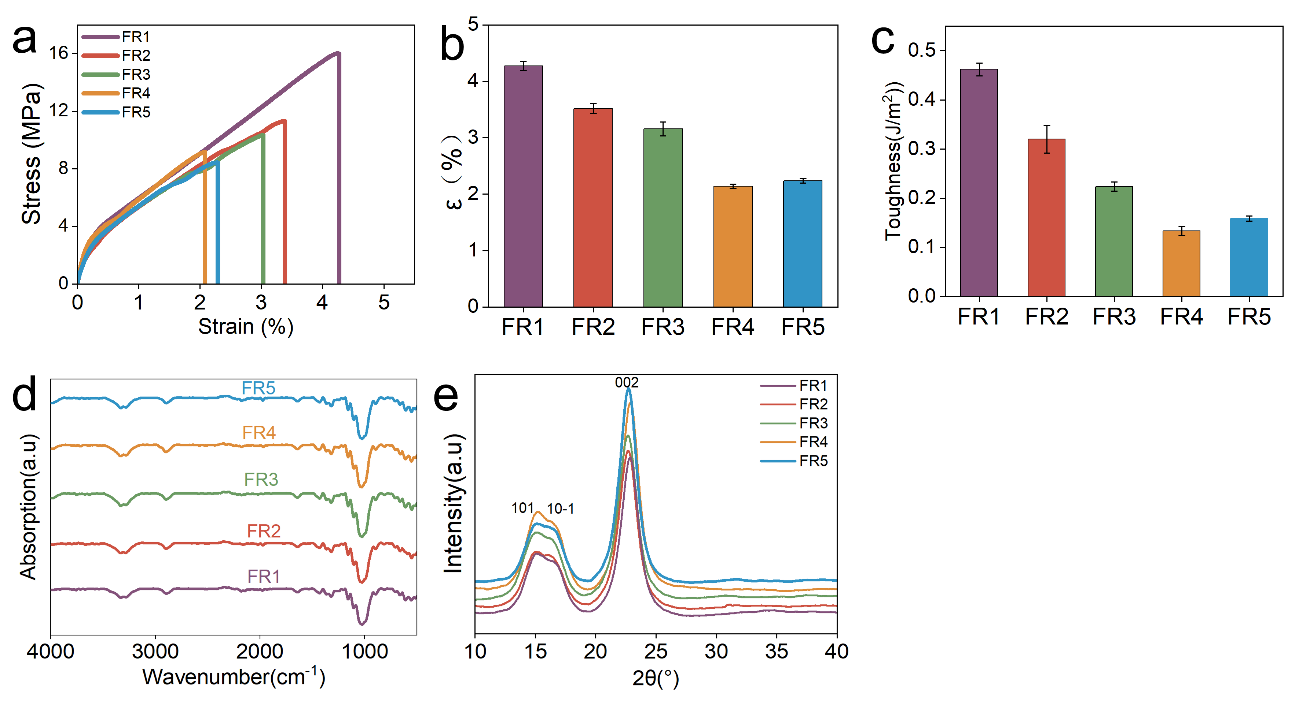


**Figure S1.** Stress–strain curves(a), Elongation at break (b), and toughness (c) of recycled paper. FTIR spectra (d) and XRD patterns (e) of FR1–FR5.
